# Supplementary material for: Microhomology-assisted scarless genome editing in human iPSCs
Source: PubMed Central journal article supplement (PMC5838097; doi:10.1038/s41467-018-03044-y), 2018-03-05
Supplement: 41467_2018_3044_MOESM1_ESM.pdf [file 41467_2018_3044_MOESM1_ESM.pdf]

## **SUPPLEMENTARY INFORMATION**

### **Microhomology-assisted scarless genome editing in human iPSCs**

Shin-Il Kim, Tomoko Matsumoto, Harunobu Kagawa, Michiko Nakamura, Ryoko Hirohata, Ayano Ueno, Maki Ohishi, Tetsushi Sakuma, Tomoyoshi Soga, Takashi Yamamoto, and Knut Woltjen

#### **This file includes:**

Supplementary Figures 1-19

Supplementary Tables 1-10

Supplementary References

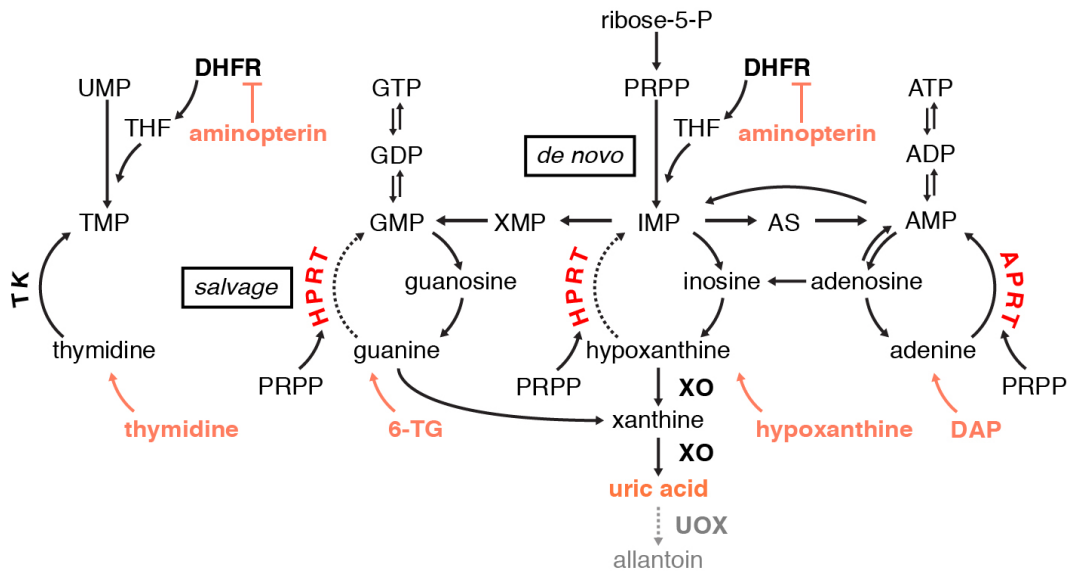

### Supplementary Figure 1. Purine biosynthesis pathways and metabolic selection.

*De novo* synthesis and salvage pathways in purine metabolism. Hypoxanthine phosphoribosyltransferase (HPRT) catalyzes both the conversion of guanine to guanine monophosphate (GMP), and hypoxanthine to inosine monophosphate (IMP). With complete or partial HPRT deficiency, guanine and hypoxanthine metabolites are expected to accumulate. Xanthine oxidase (XO) converts hypoxanthine into uric acid. Unlike most mammals, humans lack uric acid oxidase (UOX) and do not enzymatically convert uric acid into allantoin, leading to hyperuricemia. Adenine phosphoribosyltransferase (APRT) catalyzes the conversion of adenine to adenine monophosphate (AMP), and prevents accumulation of 2,8-dihydroxyadenine (2,8-DHA). At high concentrations 2,8-DHA forms crystals resulting in kidney stones, and in severe cases can cause kidney failure and urolithiasis.

Metabolic selection for HPRT activity and inactivity is carried out using media containing hypoxanthine, aminopterin, and thymidine (HAT), or 6-thioguanine (6-TG), respectively. Blocking dihydrofolate reductase (DHFR) activity with aminopterin prevents *de novo* synthesis and forces cells to rely wholly on hypoxanthine salvage by HPRT. On the other hand, active HPRT incorporates 6-TG into DNA synthesis and cell signaling pathways, leading to cytotoxicity. Metabolic selection for APRT inactivity is carried out using 2'6'-diaminopurine (DAP), a purine analogue toxic to cells competent for adenine salvage. As APRT is solely responsible for salvage of adenine, counter-selection for its activity is possible by blocking *de novo* synthesis of IMP with azaserine, or the conversion of IMP to AMP with alanosine.

Additional abbreviations: ADP, ATP, adenine di-, triphosphate; GDP, GTP, guanine di-, triphosphate; PRPP, 5-Phospho-D-ribose 1-diphosphate; THF, tetrahydrofolate; TMP, thymidine monophosphate; UMP, uracil monophosphate.

Figure adapted from <http://www.lesch-nyhan.org/en/definition/biochemistry/hprt> with permission from J.E. Visser, MD, PhD and H.A. Jinnah, MD, PhD.

```

DELETIONS
409B2      aaatagtgatagatCCATTCCTATGACTGTAGATttttatcagactgaagAGCTATTGTGTGAGT-ATatttaatatatgat      REF
409-LR2a  aaatagtgatagatCCATTCCTATGACTGTAGATttttatc-gactgaagAGCTATTGTGTGAGT-ATatttaatatatgat      (-1)
409-LR2b  aaatagtgatagatCCATTCCTATGACTGTAGATttttatc--ctgaagAGCTATTGTGTGAGT-ATatttaatatatgat      (-2)
409-LR3a  aaatagtgatagatCCATTCCTATGACT-----gaagAGCTATTGTGTGAGT-ATatttaatatatgat      (-17)
409-LR3b  aaatagtgatagatCCATTCCTATGACTGTAGATttta---gactgaagAGCTATTGTGTGAGT-ATatttaatatatgat      (-3)
409-LR4a  aaatagtgatagatCCATTCCTATGACTGTAGATttttat-----gaagAGCTATTGTGTGAGT-ATatttaatatatgat      (-6)
409-LR4b  aaatagtgatagatCCATTCCTATGACT-----gaagAGCTATTGTGTGAGT-ATatttaatatatgat      (-17)
409-LR5b  aaatagtgatagatCCATTCCTATGACTGTAGATttttatc-gactgaagAGCTATTGTGTGAGT-ATatttaatatatgat      (-1)
409-LR6a  aaatagtgatagatCCATTCCTATGACTGTAGATttttatc---tgaagAGCTATTGTGTGAGT-ATatttaatatatgat      (-4)
409-LR6b  aaatagtgatagatCCATTCCTATGACTGTAGATttttatc----tgagaAGCTATTGTGTGAGT-ATatttaatatatgat      (-4)
409-LR10a aaatagtgatagatCCATTCCTATGACTGTAGATttttatc----tgaagAGCTATTGTGTGAGT-ATatttaatatatgat      (-4)
409-LR10b aaatagtgatagatCCATTCCTATGACTGTAGATttta---actgaagAGCTATTGTGTGAGT-ATatttaatatatgat      (-4)
409-LR11a aaatagtgatagatCCATTCCTATGACTGTAGATttttatcagactgaagAGCTATTGTGTGAGT-ATatttaatatatgat      NORM
409-LR11b aaatagtgatagatCCATTCCTATGACTGTAGATt-----GTGTGAGT-ATatttaatatatgat      (-21)
409-LR12a aaatagtgatagatCCATTCCTATGACTGTAGATttttatc--ctgaagAGCTATTGTGTGAGT-ATatttaatatatgat      (-2)
409-LR12b aaatagtgatagatCCATTCCTATGACTGTAGA-----GCTATTGTGTGAGT-ATatttaatatatgat      (-17)

INSERTIONS
409B2      aaatagtgatagatCCATTCCTATGACTGTAGATttttat-cag---actgaagAGCTATTGTGTGAGTATatttaatatatgat      REF
409-LR5a  aaatagtgatagatCCATTCCTATGACTGTAGATttttatcag---actgaagAGCTATTGTGTGAGTATatttaatatatgat      (+1)

```

## Supplementary Figure 2. Spectrum of NC-TALEN-induced mutations in human female iPSC clones.

Sequence of *HPRT1* alleles from 409B2 (female) iPSC clones transfected with *HPRT1\_B* NC-TALENs and enriched by 6-TG selection on SNL feeders. PCR amplicons of the target site were TA-cloned and at least 8 bacterial colonies from each transformation were PCR-amplified to determine individual alleles by Sanger sequencing. Clones are labeled numerically and alleles alphabetically. iPSC clones with more than two alleles likely represent mosaic populations. Upper case letters represent TALEN binding sites (Fig. 1a). Inserted bases are in italics. Deletion or insertion sizes are indicated on the right. REF, parental 409B2 iPSC reference genomic sequence; NORM, non-mutant allele for the region examined by sequencing.

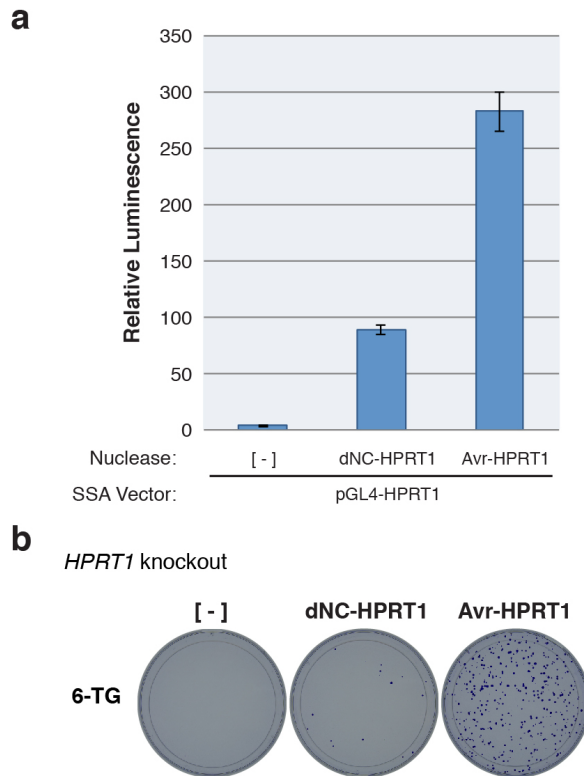

**Supplementary Figure 3. Updated TALEN architecture improves *HPRT1\_B* cleavage activity.**

- SSA assay comparing the relative activities of *HPRT1\_B* TALENs assembled using a PthXo1-based TALE scaffold (NC-TALEN) to an AvrBs3-based +136/+63 scaffold (Avr-TALEN). Error bars show s.e.m. (n = 3).
- TALEN activity in 1383D6 human male iPSCs as measured by 6-TG<sup>R</sup> colony formation, indicating *HPRT1* disruption. Spontaneous colony formation in the absence of nuclease was not noted. For the assay, 3 μg of each nuclease plasmid was transfected into 1 x 10<sup>6</sup> cells by electroporation, followed by plating at a density of 4.5 x 10<sup>5</sup> cells per 60 mm dish. iPSCs were selected and stained as described in the Methods.



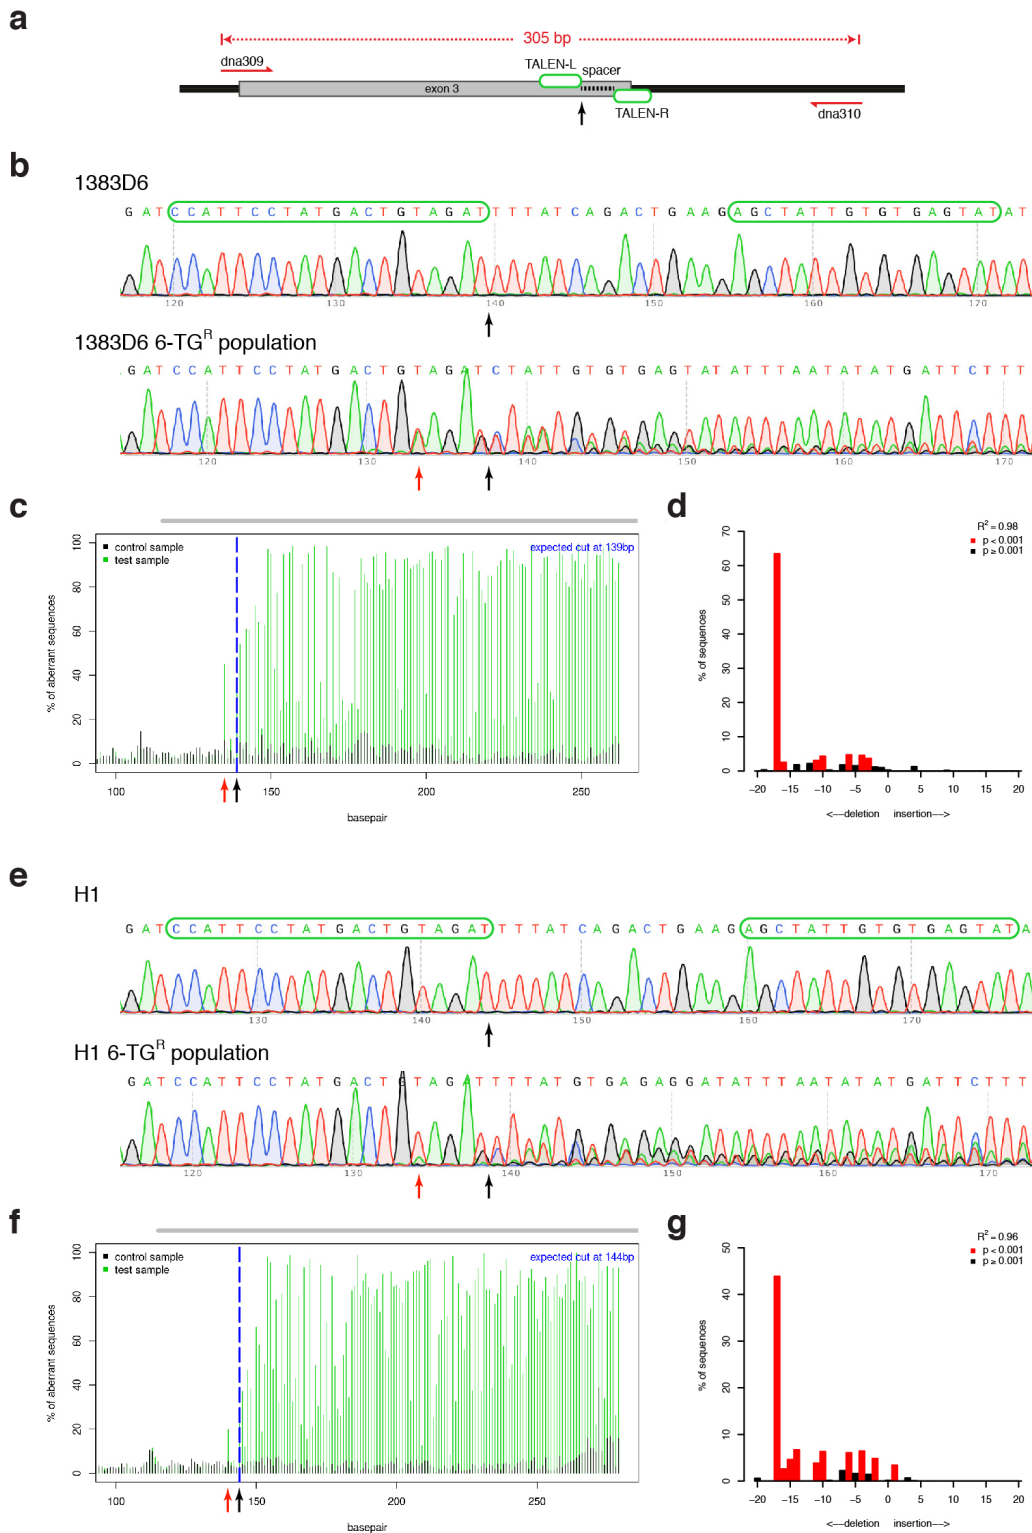

**Supplementary Figure 4. TIDE analysis of indel formation at the *HPRT1\_B* TALEN target site.**

- a. Schematic of the genomic PCR assay used to analyze the locus targeted by *HPRT1\_B* TALENs. For TIDE analysis, the breakpoint was arbitrarily positioned at the beginning of the spacer as indicated (black arrow).

- b. Sequence trace files of the original 1383D6 iPSCs, and 6-TG<sup>R</sup> population following transfection with TALENs. The position of the breakpoint used for TIDE analysis is shown (black arrow). An ambiguous A/T base is noted upstream of the predicted breakpoint (red arrow).
- c. Aberrant sequence plot determined by the online TIDE software. Arrows are as in Panel b.
- d. Spectrum of indels in the 6-TG<sup>R</sup> iPSC population as predicted by TIDE. Deletions are more common than insertions, with a clear bias towards 17 bp deletions. The data in Panel c and d was reproduced across independent experiments (n = 3).
- e. Sequence trace files of the original H1 ESCs, and 6-TG<sup>R</sup> population following transfection with TALENs. The position of the breakpoint used for TIDE analysis is shown (black arrow). An ambiguous A/T base is noted upstream of the predicted breakpoint (red arrow).
- f. Aberrant sequence plot determined by the online TIDE software. Arrows are as in Panel e.
- g. Spectrum of indels in the 6-TG<sup>R</sup> ESC population as predicted by TIDE. As with 1383D6 iPSCs, deletions are more common than insertions, with a clear bias towards 17 bp deletions (n = 1).

DELETIONS

1383D6 aaatagtgatagatCCATTCCTATGACTGTAGATttttatcagactgaagAGCTATTGTGTGAGTATatTTtaatatatgattccttttag REF  
#2 aaatagtgatagatCCATTCCTATGACTG-----aagAGCTATTGTGTGAGTATatTTtaatatatgattccttttag (-17,A)  
#4 aaatagtgatagatCCATTCCTATGACTG-----aagAGCTATTGTGTGAGTATatTTtaatatatgattccttttag (-17,A)  
#6 aaatagtgatagatCCATTCCTATGACTG-----aagAGCTATTGTGTGAGTATatTTtaatatatgattccttttag (-17,A)  
#7 aaatagtgatagatCCATTCCTATGACTGTAGATt-----ccttttag (-46)  
#8 aaatagtgatagatCCATTCCTATGACTGTAGATt-----ccttttag (-46)  
#9 aaatagtgatagatCCATTCCTATGACTG-----aagAGCTATTGTGTGAGTATatTTtaatatatgattccttttag (-17,A)  
#11 aaatagtgatagatCCATTCCTATGACTG-----aagAGCTATTGTGTGAGTATatTTtaatatatgattccttttag (-17,A)  
#12 aaatagtgatagatCCATTCCTATGACTGTAGA-----GCTATTGTGTGAGTATatTTtaatatatgattccttttag (-17,T)  
#13 aaatagtgatagatCCATTCCTATGACTGTAGA-----GCTATTGTGTGAGTATatTTtaatatatgattccttttag (-17,T)  
#14 aaatagtgatagatCCATTCCTATGACTGTAGATttt-----tag (-49)  
#15 aaatagtgatagatCCATTCCTATGACTGTAGATttta--gactgaagAGCTATTGTGTGAGTATatTTtaatatatgattccttttag (-3)  
#16 aaatagtgatagatCCATTCCTATGACTGTAGA-----agAGCTATTGTGTGAGTATatTTtaatatatgattccttttag (-14)  
#17 aaatagtgatagatCCATTCCTATGACTG-----aagAGCTATTGTGTGAGTATatTTtaatatatgattccttttag (-17,A)  
#21 aaatagtgatagatCCATTCCTATGACTGTAGA-----GCTATTGTGTGAGTATatTTtaatatatgattccttttag (-17,T)  
#24 .....agAGCTATTGTGTGAGTATatTTtaatatatgattccttttag (-77)  
#25 aaatagtgatagatCCATTCCTATGACTG-----aagAGCTATTGTGTGAGTATatTTtaatatatgattccttttag (-17,A)  
#26 aaatagtgatagatCCATTCCTATGACTG-----aagAGCTATTGTGTGAGTATatTTtaatatatgattccttttag (-17,A)  
#29 aaatagtgatagatCCATTCCTATGACTG-----aagAGCTATTGTGTGAGTATatTTtaatatatgattccttttag (-17,A)  
#30 aaatagtgatagatCCATTCCTATGACTG-----aagAGCTATTGTGTGAGTATatTTtaatatatgattccttttag (-17,A)  
#33 aaatagtgatagatCCATTCCTATGACTG-----aagAGCTATTGTGTGAGTATatTTtaatatatgattccttttag (-17,A)  
#34 aaatagtgatagatCCATTCCTATGACTGTAGA-----GCTATTGTGTGAGTATatTTtaatatatgattccttttag (-17,T)  
#35 aaatagtgatagatCCATTCCTATGACTG-----aagAGCTATTGTGTGAGTATatTTtaatatatgattccttttag (-17,A)  
#36 aaatagtgatagatCCATTCCTATGACTG-----aagAGCTATTGTGTGAGTATatTTtaatatatgattccttttag (-17,A)  
#40 aaatagtgatagatCCATTCCTATGACTGTAGATttt-----TTGTGTGAGTATatTTtaatatatgattccttttag (-17)  
#45 aaatagtgatagatCCATTCCTATGACTG-----aagAGCTATTGTGTGAGTATatTTtaatatatgattccttttag (-17,A)  
#47 aaatagtgatagatCCATTCCTATGACTGTAGATttttatcag-----TGCTGAGTATatTTtaatatatgattccttttag (-184)  
#48 aaatagtgatagatCCATTCCTATGACTGTAGA-----GCTATTGTGTGAGTATatTTtaatatatgattccttttag (-17,T)  
#49 aaatagtgatagatCCATTCCTATGACTGTAGATt-----ccttttag (-46)  
#54 aaatagtgatagatCCATTCCTATGACTG-----aagAGCTATTGTGTGAGTATatTTtaatatatgattccttttag (-17,A)  
#55 aaatagtgatagatCCATTCCTATGACTGTAGATtttat-----TGCTGAGTATatTTtaatatatgattccttttag (-16)  
#56 aaatagtgatagatCCATTCCTATGACTGTAGATtttat-----TGCTGAGTATatTTtaatatatgattccttttag (-16)

INSERTIONS

1383D6 aaatagtgatagatCCATTCCTATGACTGTAGATttttatcag----ac----tgaagAGCTATTGTGTGAGTATatTTtaatatatgattccttttag REF  
#3 aaatagtgatagatCCATTCCTATGACTGTAGATttttatcagcacagac----tgaagAGCTATTGTGTGAGTATatTTtaatatatgattccttttag (+5)  
#18 aaatagtgatagatCCATTCCTATGACTGTAGATttttatcag----acagactgaagAGCTATTGTGTGAGTATatTTtaatatatgattccttttag (+4)  
#50 aaatagtgatagatCCATTCCTATGACTGTAGATttttatctgtaggactgaacgctcttctcgcagatgtgatgaaggagatggggagccatca... (+156)

COMPLEX

1383D6 cactgaataga<sup>aaatagtgatagatCCATTCCTATGACTGTAGATttttatcagactgaagAGCTATTGTGTGAGTATatt</sup> REF  
#37 ctgaagttt<sup>aaaaagctaagaggtgtttgtttataaagtttaag</sup>--tatga<sup>aactgaagAGCTATTGTGTGAGTATatt</sup> (-45,+43,C>G, G>A)

### Supplementary Figure 5. Spectrum of Avr-TALEN-induced mutations in human male iPSCs clones.

Sequence of *HPRT1* alleles types detected in a series of individual clones derived from 1383D6 iPSC clones transfected with *HPRT1\_B* Avr-TALENs and enriched by 6-TG selection under feeder-free conditions. PCR amplicons of the target site were directly Sanger sequenced. Mixed sequences were not included in the analysis. Clones are labeled numerically. Upper case letters represent *HPRT1\_B* Avr-TALEN binding sites. Inserted bases are in italics. Modified bases are underlined. Deletion or insertion sizes are indicated on the right. Apart from  $\Delta 17$ , the most common deletion was  $\Delta 46$  (3/31 deletions), where the deletion boundaries were positioned within T-rich sequences following a predicted ‘GATT’ microhomology. The  $\Delta 77$  mutation occurred at another short tandem repeat ‘CTGA’, again indicative of MMEJ. REF, parental 1383D6 iPSC reference genomic sequence.

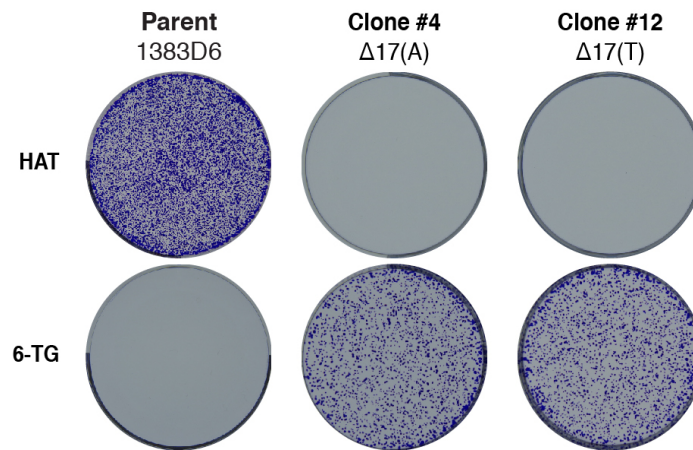

**Supplementary Figure 6. Drug sensitivities of 1383D6 parental and *HPRT1* knockout iPSC clones.**

Crystal violet staining of representative *HPRT1* knockout clonal iPSC lines following treatment with 6-TG or HAT media for 3 days. Resistance and sensitivity correlates with the status of the *HPRT1* locus, as determined by PCR genotyping and sequencing (Supplementary Fig. 5). Parental 1383D6 iPSCs are included as a control.

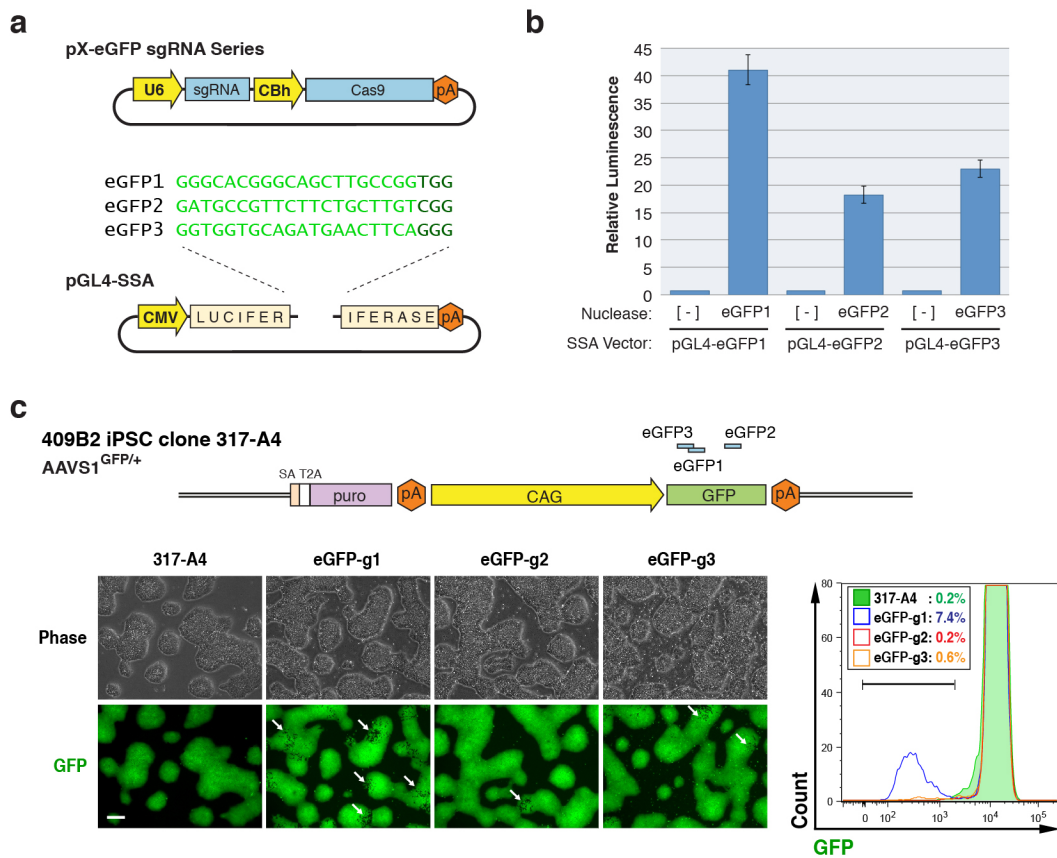

### Supplementary Figure 7. Screening eGFP sgRNAs for cleavage activity.

- Diagram of the sgRNA and Cas9 expression vector pX330<sup>1</sup>, and the associated pGL4-SSA target plasmids used for the plasmid cleavage assay. The three eGFP protospacer sequences<sup>2</sup> are shown.
- Relative nuclease activities as determined by luciferase expression. pGL4-SSA plasmids were transfected individually with or without the concordant pX-eGFP nuclease plasmid. Error bars show s.e.m. (n = 3).
- A transgene disruption assay was designed to assess genomic cleavage activity in iPSCs. 317-A4 iPSCs are heterozygous for a constitutively expressed CAG::eGFP reporter transgene targeted to the AAVS1 locus<sup>3</sup>. Relative positions of the three sgRNAs are shown. Microscopy and FACS analysis for GFP expression 5 days after nuclease transfection was used to compare the activities of the three sgRNAs. The most potent sgRNA, eGFP1, is referred to as 'ps1' in the Results. White arrows indicate GFP negative regions. Scale bar, 200  $\mu$ m.

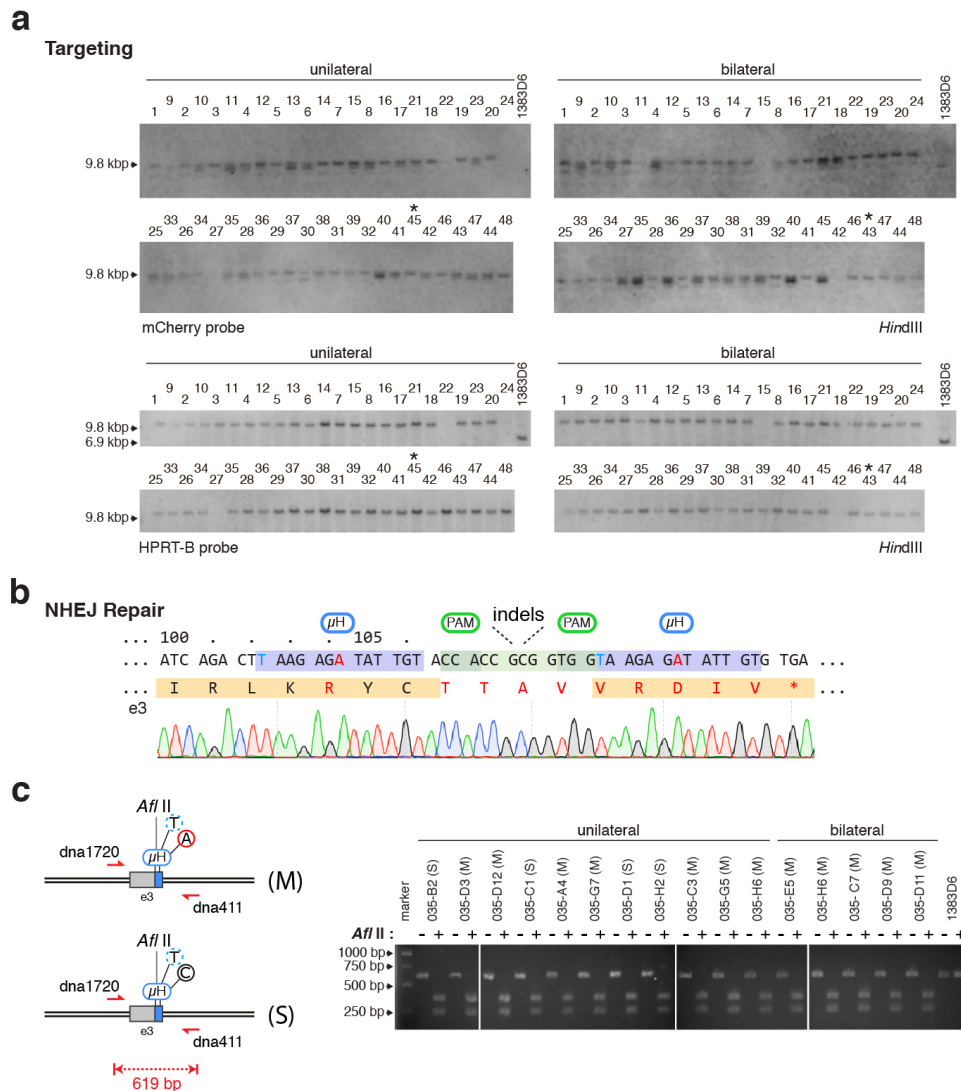

**Supplementary Figure 8. Targeting the *HPRT1* locus with cassettes flanked by imperfect microhomology.**

- Southern blotting results for 96 iPSC clones targeted with either unilaterally or bilaterally mutant  $\mu$ H, and probed with either transgene (mCherry, top) or genomic (HPRT-B, bottom) probes. The predicted 6.9 kbp (normal) and 9.8 kbp (targeted) band sizes shown in Fig. 2b are indicated. Selected clones (033-U-45 and 033-B-43) are indicated with an asterisk. 1383D6 iPSCs are included as a control.
- Sequence trace file of a majority iPSC clone where DSBR following cassette excision is a result of error-free NHEJ. Note direct fusion of the ends predicted to be formed by CRISPR-Cas9-induced DSBs. A minority of these clones included random indels from error-prone NHEJ. Clone proportions are indicated in Table 1.
- RFLP assay by *Af*II digestion of PCR amplicons from MhAX iPSC clones engineered with unilateral or bilateral homology, indicating the presence of the engineered Silent (S) mutation in all clones tested. Clones labelled with ‘M’ were found to also contain the Munich mutation by sequencing. 1383D6 iPSCs are included as a negative control for cleavage.

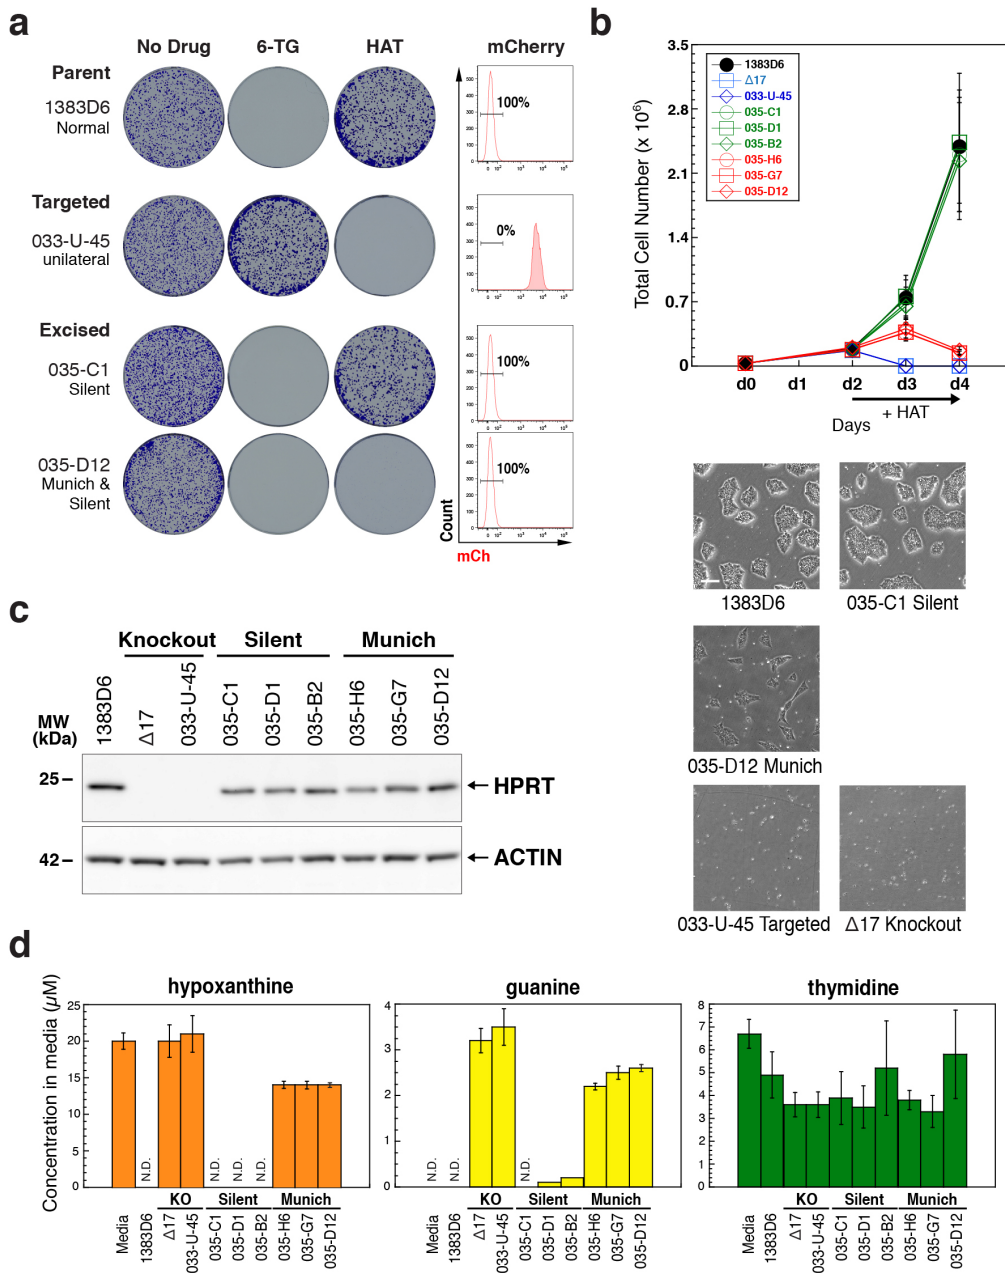

**Supplementary Figure 9. Metabolic phenotyping confirms purine salvage defects in  $HPRT_{Munich}$  iPSCs.**

- Reversal of 6-TG and HAT drug sensitivities during engineering of the *HPRT1* locus as shown by crystal violet staining of iPSC colonies only occurs for clones with a Silent mutation (035-C1), while clone 035-D12 remains sensitive to both drugs. Original 1383D6 and unilateral parent clone 033-U-45 are included as controls. FACS analysis for mCherry is shown on the right.
- Growth curve analysis of parental and engineered iPSCs in the presence of HAT selective pressure.  $HPRT_{Munich}$  iPSCs show a reduced sensitivity to HAT compared to knockouts ( $\Delta 17$ ) or targeted parental clone 033-U-45. The growth of iPSCs with Silent mutations are indistinguishable from 1383D6. Note that the behavior of individual clones with similarly engineered

- genotypes were highly comparable. Morphology of iPSCs colonies after 24 hrs of HAT selection is shown below. Image data is representative of two independent experiments. Error bars show s.e.m. (n = 3). Scale bar, 200  $\mu$ m.
- c. Western blot analysis of HPRT protein levels in parental and engineered iPSC clones. Knockout lines  $\Delta$ 17 and 033-U-45 produce no HPRT protein. Expression levels in HPRT<sub>Munich</sub> and HPRT<sub>Silent</sub> control clones are comparable to normal 1383D6 iPSCs. ACTIN is used as a loading control.
  - d. CE-MS metabolite assay of spent media from parental and engineered iPSCs. Hypoxanthine and guanine accumulate as a result of HPRT deficiency, while a partial metabolic defect is observed for HPRT<sub>Munich</sub> cells. HPRT<sub>Silent</sub> control iPSCs behave similarly to 1383D6. As expected, thymidine levels are not correlated with *HPRT1* genotype (control). For clones 035-D1 and 035-B2, guanine was detected in only 1 of 3 samples. N.D., not detected. Error bars show s.e.m. (n = 3).



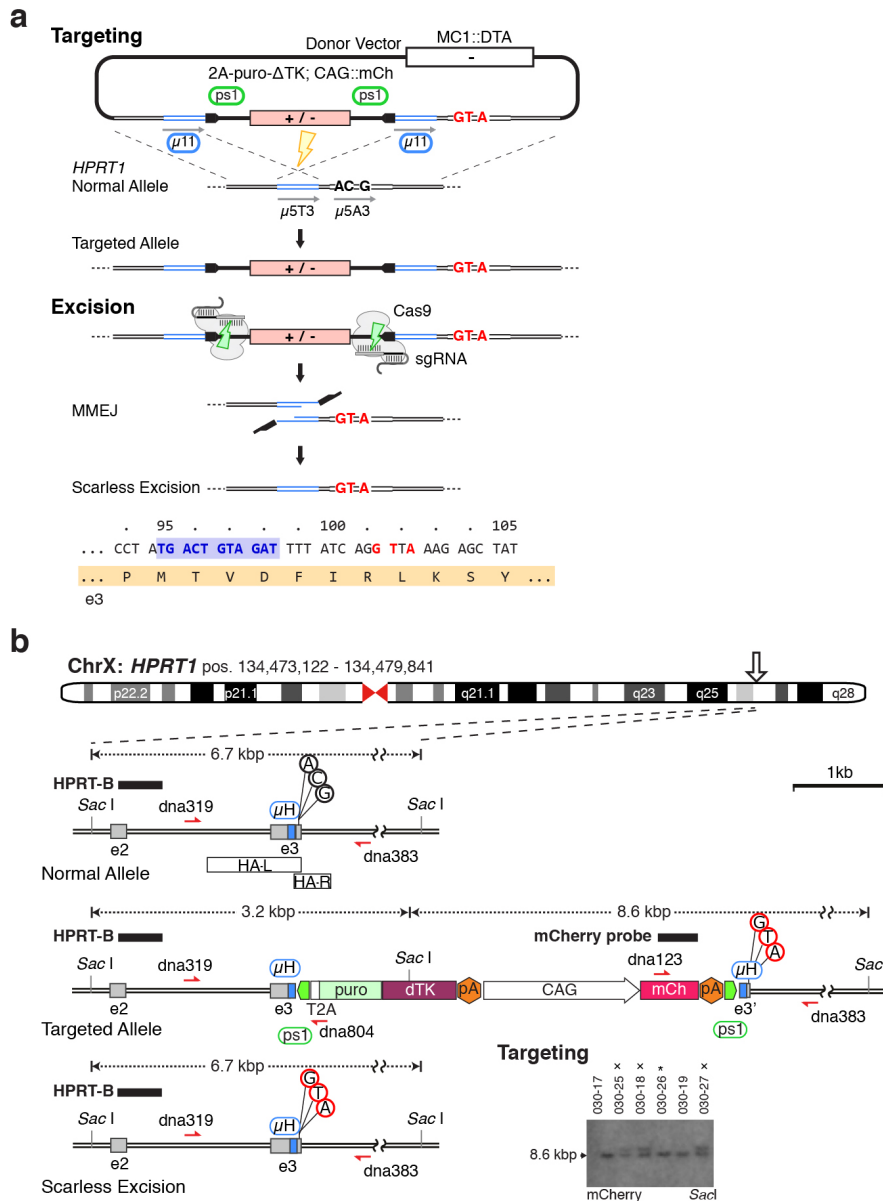

**Supplementary Figure 10. Targeting *HPRT1* with a  $\mu$ 11 MhAX cassette.**

- Schematic overview of gene targeting to generate clones for the *HPRT1* chromosomal excision assay. Left and right donor vector homology arms overlap, generating an 11 bp tandem  $\mu$ H (blue) flanking the positive/negative selection marker (red). Synonymous mutations disrupting the endogenous  $\mu$ 5A3 sequence are shown in red. A diphtheria toxin (DTA) negative selection marker driven by the MC1 promoter was included in the donor backbone, but was found to be ineffective (see Panel b, bottom right). Gene targeting was stimulated with *AvrHPRT1\_B* TALENs (yellow bolt). The remaining elements are as described in Fig. 2a.
- Detailed schematic of *HPRT1* gene targeting and MMEJ resolution. Labelling is consistent with Fig. 2b. Southern blot verification of targeted clones using the mCherry probe (bottom right), where an asterisk (\*) denotes clones used for subsequent assays (Fig. 3 and Supplementary Fig. 12) while “x” indicates clones with random integration.

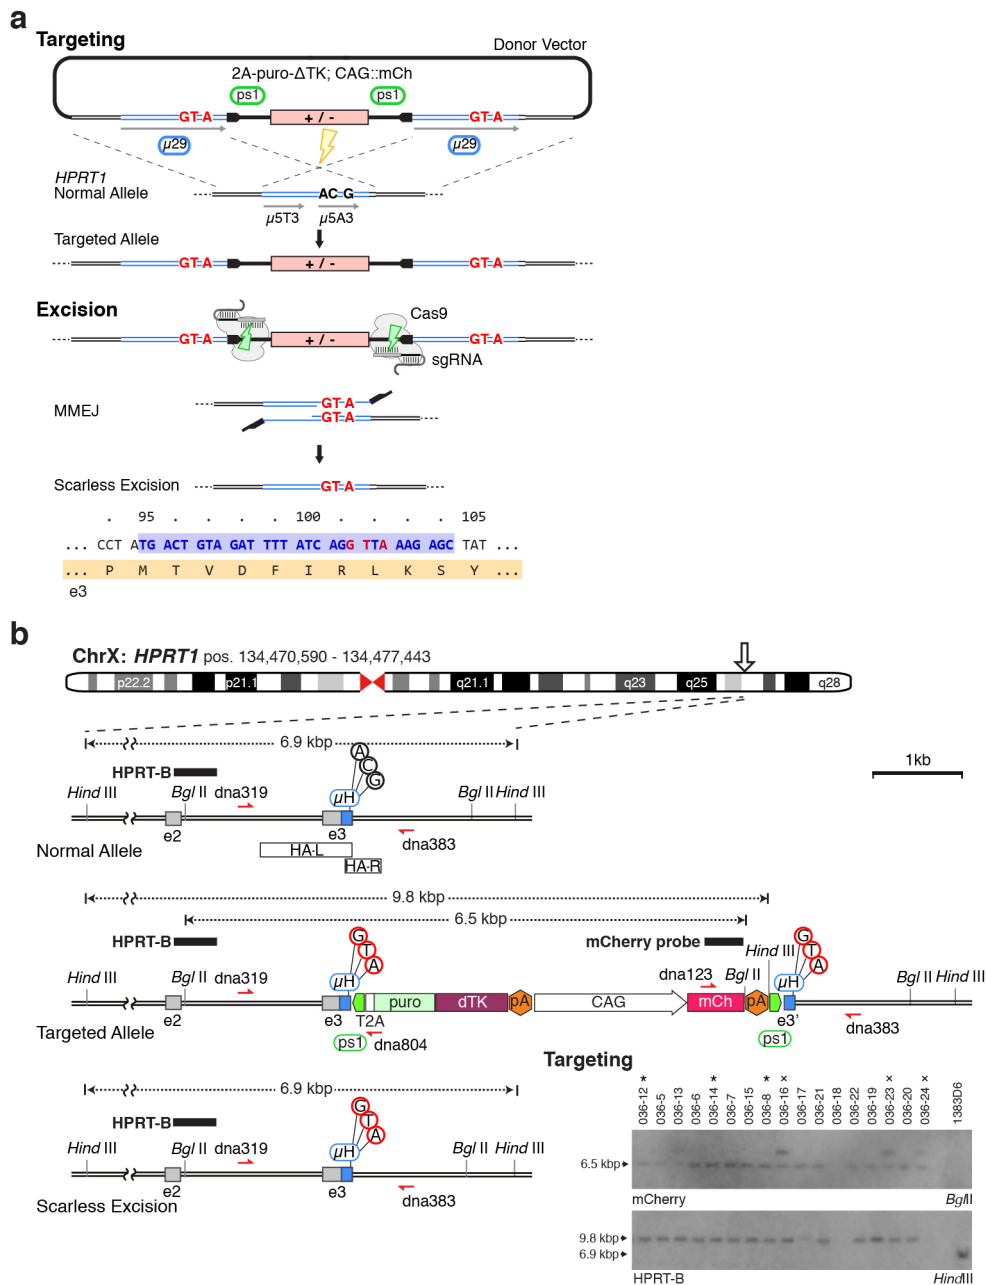

**Supplementary Figure 11. Targeting *HPRT1* with a  $\mu$ 29 MhAX cassette.**

- Schematic overview of gene targeting to generate clones for the *HPRT1* chromosomal excision assay. Left and right donor vector homology arms overlap, generating a 29 bp tandem  $\mu$ H (blue) flanking the positive/negative selection marker (red). Synonymous mutations disrupting the endogenous  $\mu$ 5A3 sequence are shown in red. Gene targeting was stimulated with *AvrHPRT1\_B* TALENs (yellow bolt). The remaining elements are as described in Fig. 2a.
- Detailed schematic of *HPRT1* gene targeting and MMEJ resolution. Labelling is consistent with Fig. 2b. Southern blot verification of targeted clones using the mCherry and HPRT-B probes (bottom right), where an asterisk (\*) denotes clones used for subsequent assays (Fig. 3, Table 2 and Supplementary Fig. 12) while "x" indicates clones with random integration.

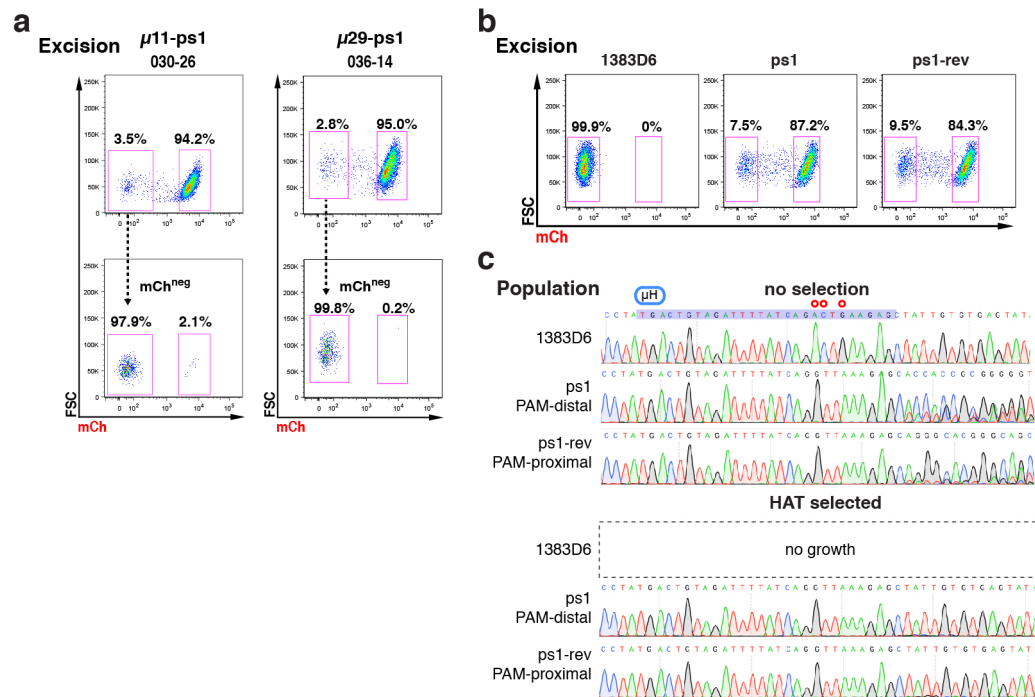

### Supplementary Figure 12. Effect of protospacer inversion on MMEJ repair.

- FACS for mCh<sup>neg</sup> cells following transfection of targeted iPSC clones (differing in  $\mu H$  length) with pX-ps1 to stimulate cassette excision.  $\mu 29$  excision data is representative of three independent clones.
- FACS analysis for mCh<sup>neg</sup> cells following transfection of targeted iPSC clones (inverted protospacers) with pX-ps1. Parental 1383D6 iPSCs are included as a control. Clones for this assay were generated using gene targeting as outlined in Supplementary Fig. 11, except with inverted ps1 protospacers in the case of ps1-rev.
- Sanger sequencing of excised populations shown in Panel b with and without HAT selection. With HAT selection, the predominance of indel-free sequences bearing engineered synonymous mutations indicates that the population is biased towards MMEJ repair, irrespective of the ps1 protospacer orientation.  $\mu H$  regions (blue) and synonymous mutations (red) are indicated.

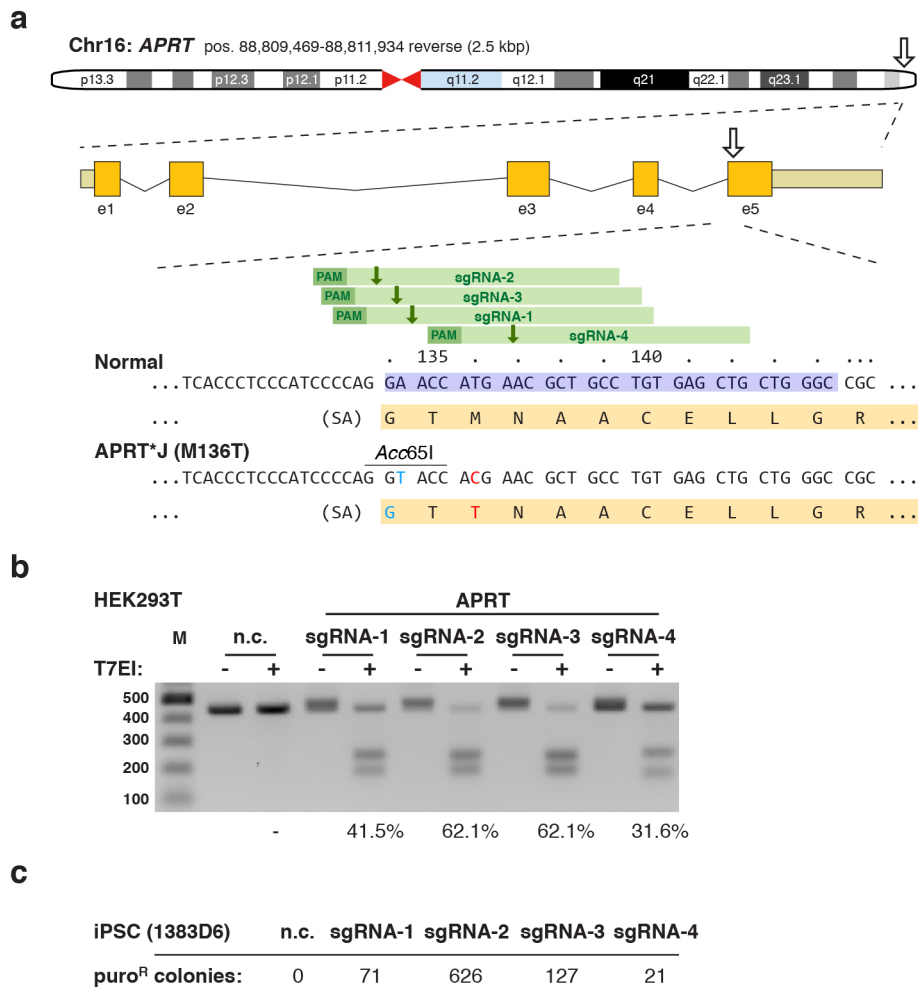

### Supplementary Figure 13. Validation of APRT sgRNAs.

- Schematic of the human *APRT* locus and strategy for engineering the APRT\*J mutation. Detail is shown for exon 5 (orange) including the splice junction, CRISPR-Cas9 target sites 1 through 4 (green), and selected  $\mu$ 32 microhomology (blue). *APRT* codons are numbered above. Chromosome positions refer to *H. sapiens* GRCh38. Bases targeted for MhAX editing are shown in blue (silent) or red (APRT\*J). SA, splice acceptor.
- T7EI assay results revealing the activity of sgRNAs 1 through 4 in HEK293T cells. n.c., negative control without nuclease transfection.
- Puro<sup>R</sup> iPSC colony numbers resulting from *APRT* gene targeting stimulated with sgRNAs 1 through 4. One million 1383D6 iPSCs were electroporated with 3  $\mu$ g of APRT-2A-puro $\Delta$ TK donor vector only (n.c.), or the donor plus 1  $\mu$ g of the appropriate sgRNA expression vector and plated on two 60 mm dishes ( $5 \times 10^5$  cells each). Colony numbers are the total from two dishes.

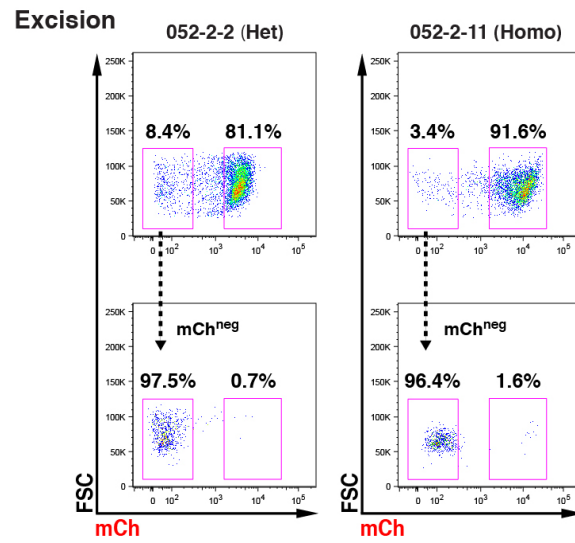

**Supplementary Figure 14. Flow cytometry analysis of *APRT* gene targeting and excision.**

FACS for mCh<sup>neg</sup> cells following transfection with pX-ps1 to stimulate cassette excision. As expected, excision rates are lower for homozygously targeted clones.

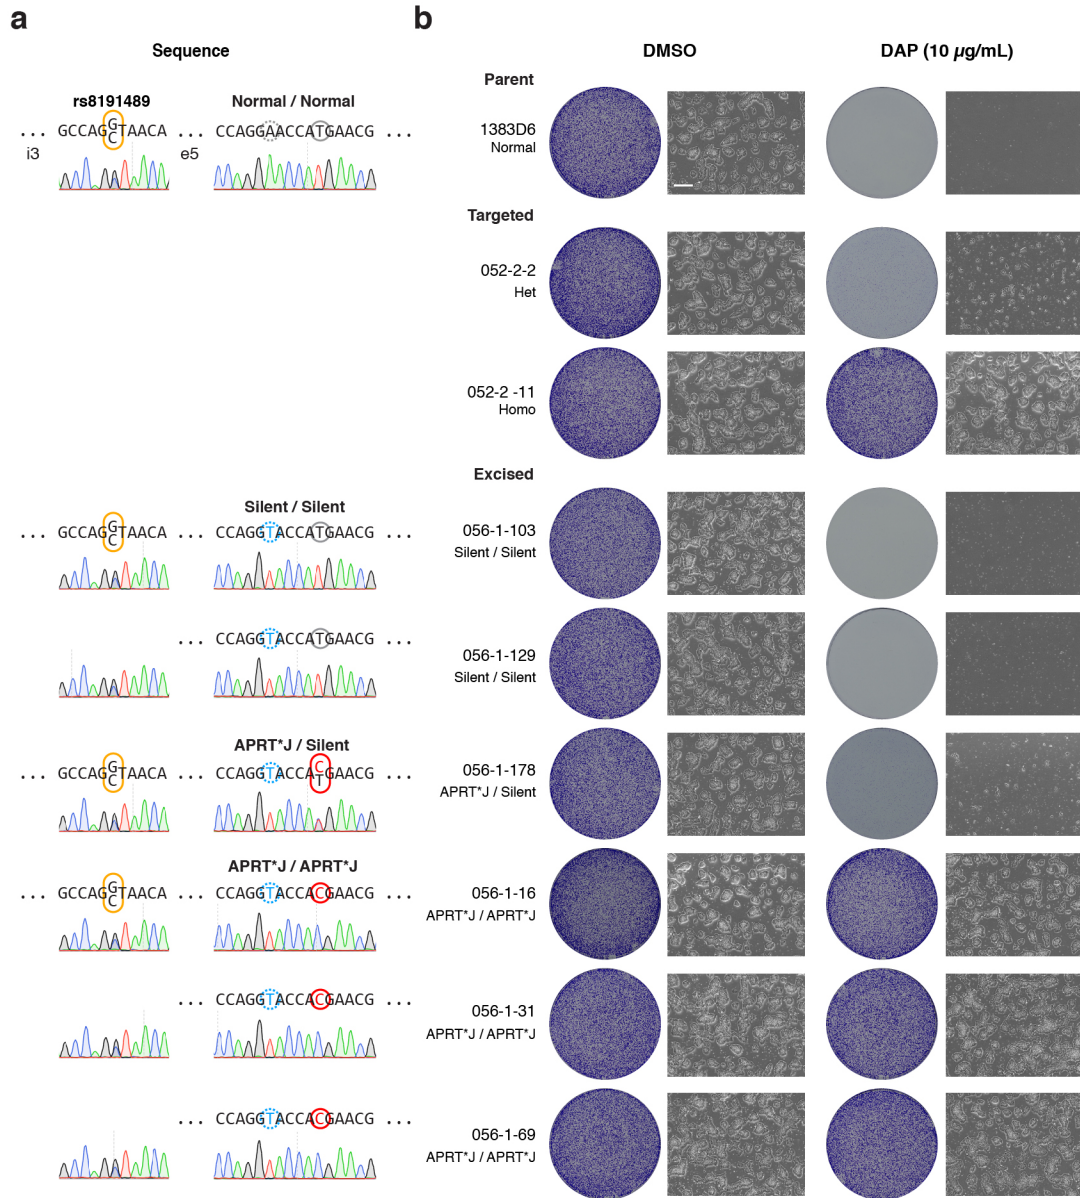

**Supplementary Figure 15. Metabolic phenotyping confirms altered enzyme function in mono- and biallelically modified APRT\*J iPSCs.**

- Sequence trace files of iPSC clones biallelically engineered with APRT\*J and/or Silent mutations following scarless MMEJ cassette excision. Both types of clones were isolated from the same targeted iPSC (052-2-11). Inclusion of the neighboring heterozygous SNP (rs8191489) in the PCR amplicon ensures analysis of both alleles.
- Crystal violet staining of iPSC culture dishes following treatment with DMSO (left), or DAP (right) for a period of 2 d. Scale bar, 500 µm.

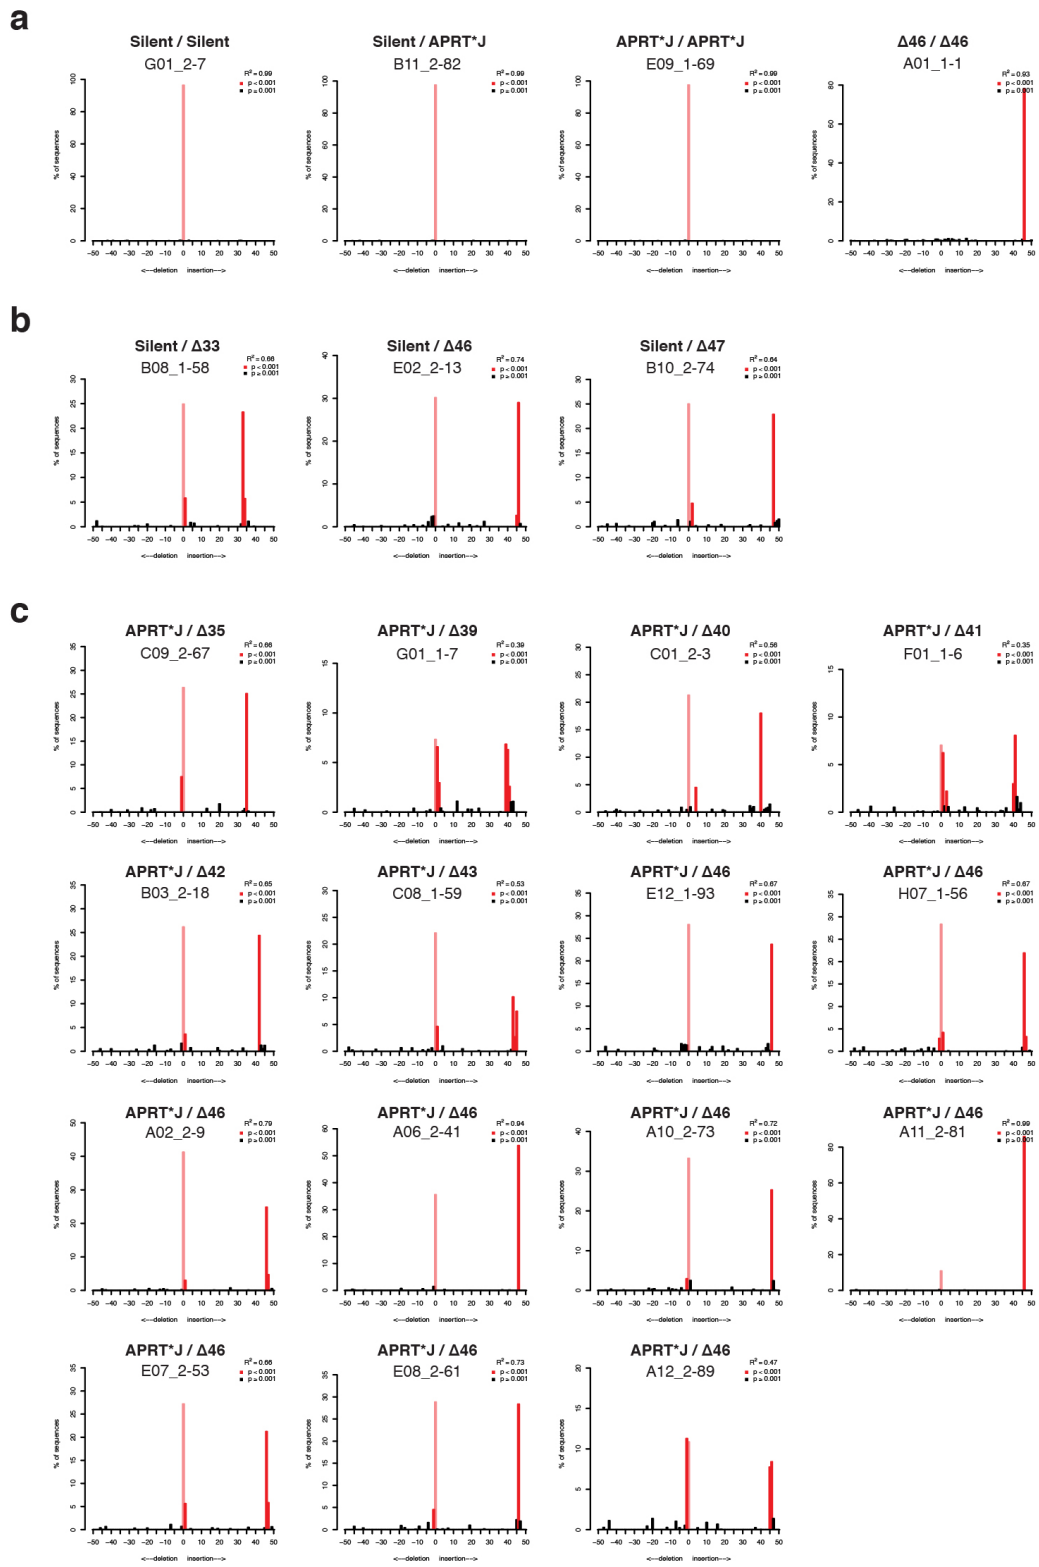

- b. Representative TIDE analysis for biallelic repair of the *APRT* locus by two different DSBR mechanisms; MMEJ resulting in deposition of a Silent point mutation on one allele, and NHEJ resulting in a random indel on the other.
- c. Representative TIDE analysis for biallelic repair of the *APRT* locus by two different DSBR mechanisms; MMEJ resulting in deposition of APRT\*J & Silent point mutations on one allele (APRT\*J), and NHEJ resulting in a random indel on the other. Genotypes listed in Panels a-c were verified by sequence alignment to the reference human genome.



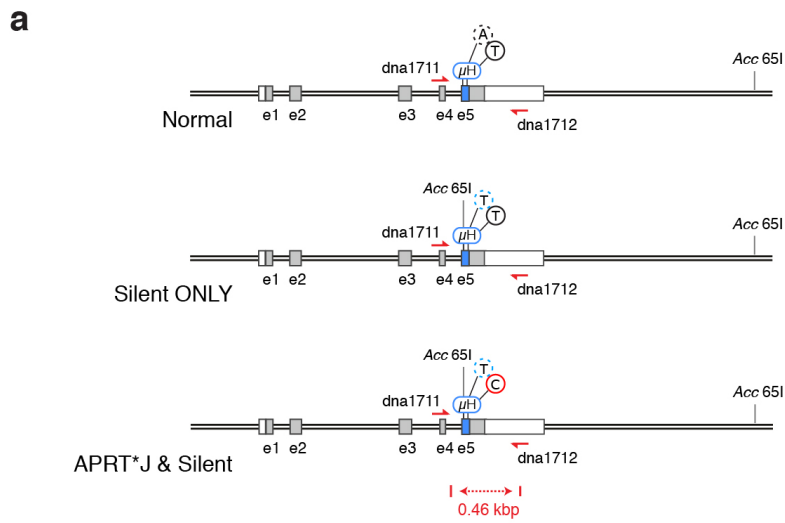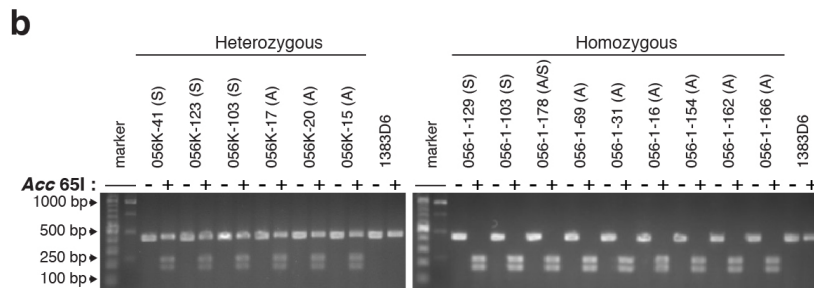

**Supplementary Figure 17. RFLP assay for the *APRT* Silent mutation.**

- Schematic of the parental and edited *APRT* alleles, and the resulting RFLP generated by the Silent mutation.
- Gel electrophoresis following *Acc65I* digestion of PCR amplicons from excised hetero- or homozygously targeted iPSC clones, indicating the presence of the engineered Silent mutation. 1383D6 iPSCs are included as a negative control for cleavage.

*HPRT1*  
Munich ( $\mu$ 13)

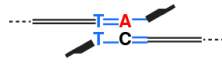

Targeting

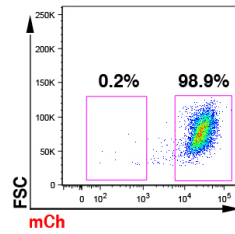

Excision

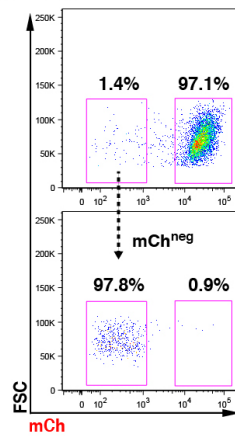

**Supplementary Figure 18. FACS-based isolation of edited *HPRT*<sub>Munich</sub> iPSCs.**

Representative FACS plots for the isolation of iPSCs edited at the *HPRT1* locus. The donor vector, allele, and additional features are as described in Fig. 2a and b.



## Supplementary Tables

### Supplementary Table 1. Characteristics of engineered microhomologies used in this study

| Purpose              | Name                  | Mutation       | Pos.   | Laterality | $\mu$ H Sequence *                               | Len. | GC (%) | PAM +1 | Het.     |
|----------------------|-----------------------|----------------|--------|------------|--------------------------------------------------|------|--------|--------|----------|
| HPRT-Native          | $\mu$ 5W3             | T              | 5'     | uni        | GACTGtAGA                                        | 9    | 44     | n/a    | $\leq 8$ |
|                      |                       | A              | 3'     |            | GACTGaAGA                                        | 9    | 44     | n/a    | $\leq 8$ |
| HPRT Munich          | $\mu$ 13              | Munich, Silent | 5', 3' | bi         | tAAGAGaTATTGT                                    | 13   | 23     | T      | 7, 6     |
|                      | $\mu$ 13 ( $\mu$ 6M6) | Munich, Silent | 5'     | uni        | tAAGAGaTATTGT                                    | 13   | 23     | T      | 7        |
|                      |                       | Silent         | 3'     |            | tAAGAGCTATTGT                                    | 13   | 31     | T      | 6        |
| MMEJ Assay (Plasmid) | $\mu$ 5               | none           | 5', 3' | bi         | CGAGG                                            | 5    | 80     | C      | 7        |
|                      | $\mu$ 10              | syn            | 5', 3' | bi         | CGAGGCTAAa                                       | 10   | 50     | C      | 7        |
|                      | $\mu$ 15              | syn            | 5', 3' | bi         | CGAGGCTAAaGTcGT                                  | 15   | 53     | C      | 7        |
|                      | $\mu$ 20              | syn            | 5', 3' | bi         | CGAGGCTAAaGTcGTtGAt                              | 20   | 45     | C      | 7        |
|                      | $\mu$ 30              | syn            | 5', 3' | bi         | CGAGGCTAAaGTcGTtGAttTGGACACCGG                   | 30   | 53     | C      | 7        |
|                      | $\mu$ 40              | syn            | 5', 3' | bi         | CGAGGCTAAaGTcGTtGAttTGGACACCGTAAAGACTg           | 40   | 50     | C      | 6, 7     |
|                      | $\mu$ 50              | syn            | 5', 3' | bi         | CGAGGCTAAaGTcGTtGAttTGGACACCGTAAAGACTgGGTGTGAACC | 50   | 52     | C      | 7        |
| MMEJ Assay (HPRT)    | $\mu$ 11              | syn (external) | 5', 3' | bi         | TGACTGTAGAT                                      | 11   | 36     | T      | 7, 6     |
|                      | $\mu$ 29              | syn            | 5', 3' | bi         | TGACTGTAGATTTTATCAGgtTaAAGAGC                    | 29   | 34     | T      | 7, 6     |
|                      |                       | syn            | 5', 3' | bi         | TGACTGTAGATTTTATCAGgtTaAAGAGC                    | 29   | 34     | A      | 18, 17   |
| APRT*J               | $\mu$ 6Y25            | APRT*J, Silent | 5'     | uni        | GtACCAcGAACGCTGCCTGTGAGCTGCTGGGC                 | 32   | 66     | A      | 7        |
|                      |                       | Silent         | 3'     |            | GtACCATGAACGCTGCCTGTGAGCTGCTGGGC                 | 32   | 63     | A      | 7        |

\* Lower-case characters indicate mutations. Pos., position; Len., length; Het., heterology; Syn, synonymous mutation; uni, unilateral; bi, bilateral.

### Supplementary Table 2. HPRT allele spectrum following FACS enrichment

| Samples Analyzed | non-targeted  |       | NHEJ           | MMEJ        |                 | Fidelity (%) |
|------------------|---------------|-------|----------------|-------------|-----------------|--------------|
|                  | Normal Allele | indel | NHEJ (Perfect) | Silent ONLY | Munich & Silent |              |
| 90               | 0             | 1     | 84 (36)        | 2           | 3               | 5.6          |

**Supplementary Table 3. Plasmids used in this study**

| Purpose                   | Plasmid ID #  | Plasmids                      |
|---------------------------|---------------|-------------------------------|
| TALENs                    | KW228         | PB-CAG-dNC-HPRT1_L-GFP        |
|                           | KW229         | PB-CAG-dNC-HPRT1_R-mCh        |
|                           | TY026         | CAG-Avr-HPRT-LEFT             |
|                           | TY027         | CAG-Avr-HPRT-RIGHT            |
| CRISPR/Cas9               | KW532         | pX-EGFP-g1 (alias: pX-ps1)    |
|                           | KW533         | pX-EGFP-g2                    |
|                           | KW534         | pX-EGFP-g3                    |
|                           | KW817         | pX-APRT-sg1                   |
|                           | KW818         | pX-APRT-sg2                   |
|                           | KW819         | pX-APRT-sg3                   |
| HPRT Donor Vectors        | KW820         | pX-APRT-sg4                   |
|                           | KW293         | p3-HPRT1                      |
|                           | KW836         | p3-HPRT1-S104R-PdTK-mCh       |
|                           | KW838         | p3-HPRT1-S104Rf-PdTK-mCh      |
|                           | KW794         | pDT-HPftsG1-CAG-mCh           |
|                           | KW883         | pHPftsG1-u29-CAG-mCh          |
| APRT Donor Vectors        | KW1033        | pbG-HPRT-u29-eGFP1-PdTKmCh    |
|                           | KW1034        | pbG-HPRT-u29-eGFP1rev-PdTKmCh |
| Donor Cassette            | KW827         | pCR4-hAPRT-G                  |
|                           | KW1005        | pbG-APRT-J-u32uni-PdTKmCh     |
| Donor Backbone            | KW999         | pAAVS1-PdTK-CAG-mCh-[uBgIII]  |
| SSA assay (luciferase)    | KW991         | pCAG-eGFP-pA                  |
|                           | KW206         | pGL4-AAVS1                    |
|                           | KW850         | pGL4-SSA-eGFP1                |
|                           | KW859         | pGL4-SSA-eGFP2                |
| MMEJ assay (luciferase)   | KW862         | pGL4-SSA-eGFP3                |
|                           | KW855         | pGL4K-MMEJ-eGFP1- $\mu$ 0     |
|                           | KW868         | pGL4K-MMEJ-eGFP1- $\mu$ 5     |
|                           | KW856         | pGL4K-MMEJ-eGFP1- $\mu$ 10    |
|                           | KW869         | pGL4K-MMEJ-eGFP1- $\mu$ 15    |
|                           | KW857         | pGL4K-MMEJ-eGFP1- $\mu$ 20    |
|                           | KW858         | pGL4K-MMEJ-eGFP1- $\mu$ 30    |
|                           | KW875         | pGL4K-MMEJ-eGFP1- $\mu$ 40    |
| Luciferase Assay Controls | KW876         | pGL4K-MMEJ-eGFP1- $\mu$ 50    |
|                           | KW208         | pGL4-CMV-luc2                 |
|                           | Promega E6921 | pGL4_74_hRlucTK               |

**Supplementary Table 4. Primers used for donor vector construction in this study**

| Gene    | Purpose                 | Primer ID#                                               | Primer Name                                                                                                         | Sequence                                                                                                                       | Product Size (bp) |
|---------|-------------------------|----------------------------------------------------------|---------------------------------------------------------------------------------------------------------------------|--------------------------------------------------------------------------------------------------------------------------------|-------------------|
| HPRT    | Homology Region         | dna450                                                   | hHPRT-Fo                                                                                                            | GTGCAGTGCAGCAGAATGAT                                                                                                           | 1253              |
|         |                         | dna411                                                   | hHPRT1Cel-Rev2                                                                                                      | ATTTGTCAAACCTAGCTCCAAAGG                                                                                                       |                   |
|         | KW794 InFusion          | dna1649                                                  | HPRT-Ifs                                                                                                            | <u>CTCTATGGGTTCGACGGGCACGGGCAGCTTGCCG</u><br><u>GTGGT<u>GACTGTAGATTTTATCAGgtTaAAGAGCT</u></u><br><u>ATTGTGTGAGTAT</u>          | 3717              |
|         |                         | dna1644                                                  | HPRT-Ifas                                                                                                           | <u>ACTTCCTCTGCCCTCGGGCACGGGCAGCTTGCC</u><br><u>GGTGGT<u>ATCTACAGTCA</u>TAGGAATGGATCTATC</u><br><u>ACTATTTCCT</u>               |                   |
|         | KW836, KW838 InFusion   | dna1714                                                  | Munich-IF-R (common)                                                                                                | <u>ACTTCCTCTGCCCTCGGGCACGGGCAGCTTGCC</u><br><u>GGTGGT<u>ACAATA</u>tCTCTT<u>a</u>AGTCTGATAAAAATCT</u><br><u>ACA</u>             | 3713              |
|         |                         | dna1713                                                  | Munich-IF-F (unilateral)                                                                                            | <u>CTCTATGGGTTCGACGGGCACGGGCAGCTTGCCG</u><br><u>GTGGt<u>AAGAGCTATTGTGTGAGTATATTTAATAT</u></u><br><u>ATG</u>                    |                   |
|         |                         | dna1715                                                  | Munich-flank-IF-F (bilateral)                                                                                       | <u>CTCTATGGGTTCGACGGGCACGGGCAGCTTGCCG</u><br><u>GTGGt<u>AAGAGa</u>TATTGTGTGAGTATATTTAATAT</u><br><u>ATG</u>                    |                   |
|         | KW883 InFusion          | dna1649                                                  | HPRT-Ifs                                                                                                            | <u>CTCTATGGGTTCGACGGGCACGGGCAGCTTGCCG</u><br><u>GTGGT<u>GACTGTAGATTTTATCAGgtTaAAGAGCT</u></u><br><u>ATTGTGTGAGTAT</u>          | 3737              |
|         |                         | dna1864                                                  | HPRT-u30-Ifas                                                                                                       | <u>ACTTCCTCTGCCCTCGGGCACGGGCAGCTTGCC</u><br><u>GGTGGT<u>GCTCTTtAac</u>CTGATAAAAATCTACAGTC</u><br><u>ATAGGAATG</u>              |                   |
|         | 2A-puro-delTK InFusion  | dna1642                                                  | T2A-pdtk-Fo                                                                                                         | GAGGGCAGAGGAAGTCTTCTAACAT                                                                                                      | 1930              |
|         |                         | dna1643                                                  | T2A-pdtk-Rev                                                                                                        | GTCGACCCATAGAGCCCACCG                                                                                                          |                   |
|         | KW1033, KW1034 InFusion | dna2167                                                  | HPRTCommon-Acc-A                                                                                                    | <u>GCGAATTGGGTACCGTGCAGTGCAGCAGAATG</u><br><u>ATCAC</u>                                                                        | 946               |
|         |                         | dna2169                                                  | u29-eGFP1-B                                                                                                         | <u>TCCGCTGCCAGATCTGGGCACGGGCAGCTTGCC</u><br><u>GGTGGT<u>GCTCTTtAac</u>CTGATAAAAATCTACAGTC</u><br><u>ATAGGAATGGATC</u>          |                   |
|         |                         | dna2171                                                  | u29-eGFP1rev-B                                                                                                      | <u>TCCGCTGCCAGATCTCCACCGCAAGCTGCCCCG</u><br><u>TGCCCT<u>GCTCTTtAac</u>CTGATAAAAATCTACAGTC</u><br><u>ATAGGAATGGATC</u>          |                   |
|         |                         | dna2170                                                  | u29-eGFP1-C                                                                                                         | <u>TGCAGCCCAAGCTTGGGCACGGGCAGCTTGCCG</u><br><u>GTGGT<u>GACTGTAGATTTTATCAGgtTaAAGAGCT</u></u><br><u>ATTGTGTGAGTAT</u>           | 442               |
| dna2172 |                         | u29-eGFP1rev-C                                           | <u>TGCAGCCCAAGCTTCCACCGCAAGCTGCCCCG</u><br><u>GCCCT<u>GACTGTAGATTTTATCAGgtTaAAGAGCT</u></u><br><u>ATTGTGTGAGTAT</u> |                                                                                                                                |                   |
| dna2168 |                         | HPRTCommon-Acc-D                                         | <u>CATCATGGCCGGTACCATTTGTCAAACCTAGCT</u><br><u>CCAAAGGACT</u>                                                       |                                                                                                                                |                   |
| APRT    | Homology Region         | dna1692                                                  | hAPRT-HAF                                                                                                           | ACTCCTGTCACTTACCCTGA                                                                                                           | 1255              |
|         |                         | dna1695                                                  | hAPRT-HAR                                                                                                           | CTGGAGGGTTCTAGCTCCTG                                                                                                           |                   |
|         | KW1005 InFusion         | dna2163                                                  | APRT-Acc65I-A                                                                                                       | <u>GCGAATTGGGTACc</u> ACTCCTGTCACTTACCCTG<br><u>ACAGGCCTAG</u>                                                                 | 825               |
|         |                         | dna2164                                                  | APRT-J-Acc-B                                                                                                        | <u>CTCCGCTGCCAGATCTGGGCACGGGCAGCTTGC</u><br><u>CGGTGGa<u>GCCCAGCAGCTCACAGGCAGCGTTCg</u></u><br><u>TGGTaCCTGGGGATGGGAGGGTGA</u> |                   |
|         |                         | dna2165                                                  | APRT-Acc-C                                                                                                          | <u>CCTGCAGCCCAAGCTTGGGCACGGGCAGCTTGC</u><br><u>CGGTGGa<u>GtACCATGAACGCTGCCTGTGAG</u></u>                                       | 570               |
| dna2166 | APRT-Acc65I-D           | <u>TCATGGCCGGTACCCTGGAGGGTCTAGCTCCT</u><br><u>GAGGTG</u> |                                                                                                                     |                                                                                                                                |                   |

Operational sequences in MhAX InFusion primers are annotated as follows: underline, InFusion homology; italics, psI (eGFP1) protospacer; bold italics, PAM; double underline, microhomology; lowercase, mutations.

**Supplementary Table 5. Primers used for sgRNA construction in this study**

| Target              | sgRNA    | Primer ID# | Primer Name    | Sequence                  |
|---------------------|----------|------------|----------------|---------------------------|
| eGFP                | eGFP-1   | dna1045    | EGFP-gRNA1-Fo  | caccgGGGCACGGGCAGCTTGCCGG |
|                     |          | dna1046    | EGFP-gRNA1-Rev | aaacCCGGCAAGCTGCCCCGTGCCc |
|                     | eGFP-2   | dna1047    | EGFP-gRNA2-Fo  | caccgGATGCCGTTCTTCTGCTTGT |
|                     |          | dna1048    | EGFP-gRNA2-Rev | aaacACAAGCAGAAGAACGGCATCc |
|                     | eGFP-3   | dna1049    | EGFP-gRNA3-Fo  | caccgGGTGGTGCAGATGAACTTCA |
|                     |          | dna1050    | EGFP-gRNA3-Rev | aaacTGAAGTTCATGCACCACCc   |
| APRT                | APRT-sg1 | dna1678    | APRT-Xs1       | caccgCAGGCAGCGTTCATGGTTCC |
|                     |          | dna1679    | APRT-Xas1      | aaacGGAACCATGAACGCTGCCTGc |
|                     | APRT-sg2 | dna1680    | APRT-Xs2       | caccgGGCAGCGTTCATGGTTCCTG |
|                     |          | dna1681    | APRT-Xas2      | aaacCAGGAACCATGAACGCTGCCc |
|                     | APRT-sg3 | dna1682    | APRT-Xs3       | caccgAGGCAGCGTTCATGGTTCCT |
|                     |          | dna1683    | APRT-Xas3      | aaacAGGAACCATGAACGCTGCCTc |
|                     | APRT-sg4 | dna1684    | APRT-Xs4       | caccgCAGCTCACAGGCAGCGTTCA |
|                     |          | dna1685    | APRT-Xas4      | aaacTGAACGCTGCCTGTGAGCTGc |
| Sequence validation |          | dna790     | U6-fwd         | GAGGGCCTATTTCCCATGATTCC   |

Lower-case characters indicate overhangs for BbsI cloning and 5'-G.

**Supplementary Table 6. Primers used for luciferase vector construction in this study**

| Assay      | Purpose                      | Primer ID#          | Primer Name                                                                                                                     | Sequence                                                                                                                |
|------------|------------------------------|---------------------|---------------------------------------------------------------------------------------------------------------------------------|-------------------------------------------------------------------------------------------------------------------------|
| SSA Assay  | SSA-AAVS1                    | dna199              | AAVS1-SSAfo                                                                                                                     | gtcgGATATCTGTCCCCTCCACCCACAGTGGGGCCACT<br>AGGGACAGGATTGGTGACAGAAAAGCCCCAGGT                                             |
|            |                              | dna200              | AAVS1-SSArev                                                                                                                    | cggTACCTGGGGCTTTTCTGTACCAATCCTGTCCCTAGT<br>GGCCCCACTGTGGGGTGGAGGGGACAGATATC                                             |
|            | SSA-eGFP-1                   | dna1804             | eGFP1-SSAs                                                                                                                      | gtcgGGGCACGGGCAGCTTGCCGGTGG                                                                                             |
|            |                              | dna1805             | eGFP1-SSAas                                                                                                                     | cggTCCACCGCAAGCTGCCCGTGCCC                                                                                              |
|            | SSA-eGFP-2                   | dna1806             | eGFP2-SSAs                                                                                                                      | gtcgGATGCCGTTCCTCTGCTTGTCGG                                                                                             |
|            |                              | dna1807             | eGFP2-SSAas                                                                                                                     | cggTCCGACAAGCAGAAGAACGGCATC                                                                                             |
|            | SSA-eGFP-3                   | dna1808             | eGFP3-SSAs                                                                                                                      | gtcgGGTGGTGCAGATGAACCTCAGGG                                                                                             |
|            |                              | dna1809             | eGFP3-SSAas                                                                                                                     | cggTCCCTGAAGTTCATCTGCACCACC                                                                                             |
|            | Sequence validation          | dna197              | SSAseq-Fo                                                                                                                       | CTCAGCAAGGAGGTAGGTGAGG                                                                                                  |
|            |                              | dna198              | SSAseq-Rev                                                                                                                      | TGATCGGTAGCTTCTTTTGAC                                                                                                   |
| MMEJ Assay | ccdB Cassette (μH 0-30 bp)   | dna1842             | CamccdB-F                                                                                                                       | <u>GGATCCGGTACCGAATTCGCGGCCGATTAGGCAC</u>                                                                               |
|            |                              | dna1843             | CamccdB-R                                                                                                                       | <u>GCGGCCGCGAATTCtGTTCGACCTGCAGACTGGCTGTG</u>                                                                           |
|            | Common (μH 0-30 bp)          | dna1828             | luc2-eGFP1-uH-F                                                                                                                 | <u>AGAATTCGCGGGCCGCGGGCACGGGCAGCTTGCCGGT<b>G</b></u><br><u>GcCGAGGCTAAaGTcGTiGAtTTGGACACCGGTAAGACA</u><br><u>CTGGGT</u> |
|            |                              | μ0                  | luc2-eGFP1-u0-R                                                                                                                 | <u>CGGTACCGGATCCGGGCACGGGCAGCTTGCCGGT<b>G</b></u> <u>cA</u><br><u>AGAAGGGCACCACCTTG</u>                                 |
|            | μ5                           | luc2-eGFP1-u5-R     | <u>CGGTACCGGATCCGGGCACGGGCAGCTTGCCGGT<b>G</b></u> <u>c</u><br><u>CTCGAAGAAGGGCACCACCTTG</u>                                     |                                                                                                                         |
|            | μ10                          | luc2-eGFP1-u10-R    | <u>CGGTACCGGATCCGGGCACGGGCAGCTTGCCGGT<b>G</b></u> <u>ct</u><br><u>TTAGCCTCGAAGAAGGGCACCACCTTG</u>                               |                                                                                                                         |
|            | μ20                          | luc2-eGFP1-u20-R    | <u>CGGTACCGGATCCGGGCACGGGCAGCTTGCCGGT<b>G</b></u> <u>c</u><br><u>aTCaACgACiTTAGCCTCGAAGAAGGGCACCACCTTG</u>                      |                                                                                                                         |
|            | μ30                          | luc2-eGFP1-u30-R    | <u>CGGTACCGGATCCGGGCACGGGCAGCTTGCCGGT<b>G</b></u> <u>c</u><br><u>CGGTGTCCAAaTCaACgACiTTAGCCTCGAAGAAGGGCA</u><br><u>CCACCTTG</u> |                                                                                                                         |
|            | pGLK-CMV-luc2 (μH 40, 50 bp) | dna1848             | luc2-uH-F2                                                                                                                      | <u>CGAGGCTAAaGTcGTiGAtTTGGACACCGGTAAGACACT</u><br><u>GGGTGTGAACCAGCGCGGCAGCTGTGCGT</u>                                  |
|            |                              | dna1847             | luc2-u40plus-R2                                                                                                                 | <u>cAGTGTCTTACCGGTGTCCAAaTCaACgACiTTAGCCTCG</u><br><u>AAGAAGGGCACCACCTTGCTACTGCGCCA</u>                                 |
|            | Common (μH 40, 50 bp)        | dna1844             | eGFP1-CamccdB-R2                                                                                                                | <u>ACgACiTTAGCCTCGgCCACCGCAAGCTGCCCGTGCCC</u><br><u>GCGGCCGCGAATTCGTTCGACCTGCAGACTGGCTGTG</u>                           |
|            |                              | μ40                 | eGFP1-CamccdB-u40-F                                                                                                             | <u>ACCGGTAAGACACTgCCACCGCAAGCTGCCCGTGCCC</u><br><u>GGATCCGGTACCGAATTCGCGGCCGATTAGGCAC</u>                               |
|            | μ50                          | eGFP1-CamccdB-u50-F | <u>ACCGGTAAGACACTgGGTGTGAACCgCCACCGCAAGC</u><br><u>TGCCCGTGCCCGGATCCGGTACCGAATTCGCGGCCGC</u><br><u>ATTAGGCAC</u>                |                                                                                                                         |

Lower-case characters indicate overhangs for BsaI cloning in SSA primers, and silent mutations in MMEJ primers. Operational sequences in MMEJ Assay primers are annotated as follows: underline, InFusion homology; italics, eGFP1 protospacer; bold italics, PAM; double underline, microhomology. For μ40 and μ50 assembly, InFusion sites were within the engineered microhomology.



**Supplementary Table 7. Primers used for genotyping in this study**

| Gene                  | PCR Reaction                   | Primer ID# | Primer Name                 | Sequence                       | Product Size (bp) |
|-----------------------|--------------------------------|------------|-----------------------------|--------------------------------|-------------------|
| HPRT                  | HPRT1_B mutation analysis      | dna309     | hHPRT1Cel-Fo                | TTTCTGTAGGACTGAACGTCTTGCTC     | 305               |
|                       |                                | dna310     | hHPRT1Cel-Rev               | ATCTCACTGTAACCAAGTGAAATGAAAGC  |                   |
|                       | AflII RFLP, mutation analysis  | dna1720    | hHPRT-5int-8F               | GAAGTTTAATGACTAAGAGGTGTTTG     | 619               |
|                       |                                | dna411     | hHPRT1Cel-Rev2              | ATTTGTCAAACCTAGCTCCAAAGG       |                   |
|                       | 5' end                         | dna319     | HPRT1-LaF                   | GTGGAATTTCTGGGTCAAGGGGAAAGAG   | 1158              |
|                       |                                | dna804     | AAVS1genoS1-2               | GAGCCTAGGGCCGGGATTCTC          |                   |
|                       | Spanning (non-targeted allele) | dna319     | HPRT1-LaF                   | GTGGAATTTCTGGGTCAAGGGGAAAGAG   | 1868              |
|                       |                                | dna383     | HPRT1-RaR2                  | AGGCGAGTTTCTACAAAGATGGACAGG    |                   |
|                       | 3' end (KW668)                 | dna930     | TKseq                       | CCGCGCACCTGGTGCATGAC           | 2158              |
|                       |                                | dna383     | HPRT1-RaR2                  | AGGCGAGTTTCTACAAAGATGGACAGG    |                   |
| 3' end (KW836, KW838) | dna123                         | mCherry-F  | CCGTAATGCAGAAGAAGACCAT      | 1748                           |                   |
|                       | dna383                         | HPRT1-RaR2 | AGGCGAGTTTCTACAAAGATGGACAGG |                                |                   |
| APRT                  | T7E1, Acc65I RFLP              | dna1711    | hAPRT-T7F5                  | GTCGTGGATGATCTGCTGG            | 461               |
|                       |                                | dna1712    | hAPRT-T7R5                  | TGCCCAAGGCTGATATTTC            |                   |
|                       | 5' end                         | dna1728    | hAPRT-e1e2-F2               | CTTCCGCGACGGATGCC              | 2287              |
|                       |                                | dna804     | T2A-puroJ                   | GAGCCTAGGGCCGGGATTCTC          |                   |
|                       | Spanning (non-targeted allele) | dna1796    | SNP-rs3826074-F             | TCCTCCATTTCCACCTTCCCTA         | 4020              |
|                       |                                | dna1865    | hAPRT-HAR2                  | GCTTGCTCCCTAGAAGATG            |                   |
|                       | 3' end                         | dna1116    | rBgSp1b                     | ATGAACAAAGGTGGCTATAAAGAGGTCATC | 876               |
|                       |                                | dna1865    | hAPRT-HAR2                  | GCTTGCTCCCTAGAAGATG            |                   |

**Supplementary Table 8. Primers used for sequencing in this study**

| Template      | Application                         | Primer ID# | Primer Name    | Sequence                       |
|---------------|-------------------------------------|------------|----------------|--------------------------------|
| HPRT          | Targeted 5' arm junctions           | dna319     | HPRT1-LaF      | GTGGAATTTCTGGGTCAAGGGGAAAGAG   |
|               |                                     | dna1733    | HPRT-seq2      | CCTTTGCCCTCATGTTTCAT           |
|               |                                     | dna309     | hHPRT1Cel-Fo   | TTTCTGTAGGACTGAACGTCTTGCTC     |
|               | Targeted 3' arm junctions           | dna116     | rBgSp1b        | ATGAACAAAGGTGGCTATAAAGAGGTCATC |
|               |                                     | dna117     | rBgSp2c        | CCCAGTCATAGCTGTCCCTCTTCTTATG   |
| APRT          | Targeted 5' arm junctions           | dna1726    | hAPRT-5int-1R  | AGATCATCCACGACGACCAC           |
|               | Targeted 3' arm junctions           | dna116     | rBgSp1b        | ATGAACAAAGGTGGCTATAAAGAGGTCATC |
|               |                                     | dna1725    | hAPRT-3int-10F | GGAAATATCAGCCTTGGGCA           |
|               | Spanning, Targeted 5' arm junctions | dna1711    | hAPRT-T7F5     | GTCGTGGATGATCTGCTGG            |
|               |                                     | dna1692    | APRT-HAF       | ACTCCTGTCACTTACCCTGA           |
| TOPO Products | Universal PCR and sequencing        |            | T3             | ATTAACCCTCACTAAAGGGA           |
|               |                                     |            | T7             | TAATACGACTCACTATAGGG           |

**Supplementary Table 9. Primers used for exon genotyping in this study**

| Gene | Exon                                |                                                         |                 | Fwd Primer                |                            | Amplicon Size |
|------|-------------------------------------|---------------------------------------------------------|-----------------|---------------------------|----------------------------|---------------|
|      | no.                                 | ENSEMBL exon ID                                         | Length          | Name                      | Sequence                   |               |
| HPRT | 1                                   | ENSE00001913528                                         | 186             | dna1871                   | CAGGGAGCCCTCTGAATAGGA      | 536           |
|      |                                     |                                                         |                 | dna1872                   | GTGACGTAAAGCCGAACCC        |               |
|      | 2                                   | ENSE00003489858                                         | 107             | dna1873                   | TAGTAGAGACGGGATTTCACC      | 466           |
|      |                                     |                                                         |                 | dna1874                   | AGAACAGCTGCTGATGTTTGA      |               |
|      | 3                                   | ENSE00003623041                                         | 184             | dna1875                   | TTGGTGTGGAAGTTAATGACTAAG   | 385           |
|      |                                     |                                                         |                 | dna1876                   | ATCTCACTGTAACCAAGTAAAATG   |               |
|      | 4                                   | ENSE00003674574                                         | 66              | dna1877                   | TCTAGTCATTCATTTTCAGGAAACCT | 339           |
|      |                                     |                                                         |                 | dna1878                   | ATTGATTGAAAGCACACTGTTACT   |               |
|      | 5                                   | ENSE00003522510                                         | 18              | dna1879                   | AGCAGATGGGCCACTTGTTTA      | 252           |
|      |                                     |                                                         |                 | dna1880                   | TGGCTTACCTTTAGGATGGTG      |               |
|      | 6                                   | ENSE00003576599                                         | 83              | dna1881                   | GGGCCAGATGATATAGATTCCA     | 332           |
|      |                                     |                                                         |                 | dna1882                   | TGACAGTTGAAAACATTTATCCTTA  |               |
| 7, 8 | ENSE00003676328,<br>ENSE00003495603 | 47, 77                                                  | dna1883         | TGCTGCCCTTCTTAGTAATC      | 651                        |               |
|      |                                     |                                                         | dna1884         | GCCAGGTCCAGTTCTAAGGA      |                            |               |
| 9    | ENSE00001904310                     | 639                                                     | dna1885         | TGTGATAGACTACTGCTTTGTITTC | 1019                       |               |
|      |                                     |                                                         | dna1886         | CCGCCAACCCATTCTACC        |                            |               |
| APRT | 1 + 2                               | ENSE00002586104,<br>ENSE00001503918                     | 125,<br>107     | dna1728                   | CTTCCGGCGACGGATGCC         | 640           |
|      |                                     |                                                         |                 | dna1729                   | CTCAATCTCACAAACCTTCCCG     |               |
|      | 3, 4, 5                             | ENSE00001503917,<br>ENSE00003473485,<br>ENSE00002584924 | 134, 79,<br>143 | dna1740                   | CATGGGGAGAGGAAGGTGT        | 1255          |
|      |                                     |                                                         |                 | dna1741                   | GTACAGGTGCCAGCTTCTCC       |               |

**Supplementary Table 10. Primers used for Southern blot probe preparation in this study**

| Gene   | Probe                | Primer ID# | Primer Name   | Sequence                | Product Size (bp) |
|--------|----------------------|------------|---------------|-------------------------|-------------------|
| HPRT   | HPRT-B (5' External) | dna1718    | hHPRT-5ext-4F | GCTGAGGATTGGAAAGGGT     | 475               |
|        |                      | dna1719    | hHPRT-5ext-4R | GCCAGACATACAATGCAAGC    |                   |
| APRT   | APRT (5' Internal)   | dna1692    | hAPRT-HAF     | ACTCCTGTCACTTACCCTGA    | 496               |
|        |                      | dna1726    | hAPRT-5int-1R | AGATCATCCACGACGACCAC    |                   |
| Common | mCherry              | dna1737    | mCh-probeF    | GTTCATGTACGGCTCCAAGG    | 505               |
|        |                      | dna062     | UniFruitR     | TTACTTGTACAGCTCGTCCATGC |                   |

### Supplementary References

1. Ran, F.A. et al. Genome engineering using the CRISPR-Cas9 system. *Nature protocols* **8**, 2281-2308 (2013).
2. Fu, Y. et al. High-frequency off-target mutagenesis induced by CRISPR-Cas nucleases in human cells. *Nature biotechnology* **31**, 822-826 (2013).
3. Ocegüera-Yanez, F. et al. Engineering the AAVS1 locus for consistent and scalable transgene expression in human iPSCs and their differentiated derivatives. *Methods* **101**, 43-55 (2016).
